# Supplementary material
Source: Springer Nature journal article supplement (https://www.springermedizin.de/resource/supplementary/12913_2010_1619_MOESM1_ESM.pdf/9528618)
Supplement: MOESM1 [file 9528618]

## System Building Blocks

1. Service delivery
2. Health workforce
3. Information
4. Medical products & Technologies
5. Financing
6. Leadership/ Governance

- Access
- Coverage
- Quality
- Safety

## Functions

1. Improved Health (Level & Equity)
2. Responsiveness
3. Social and Financial Risk Protection
4. Improved Efficiency
